# Supplementary material for: Poly(phenyleneethynylene) nanoparticles: preparation, living cell imaging and potential application as drug carriers
Source: Royal Society of Chemistry journal article supplement (doi:10.1039/c5tb00064e), 2015-01-01
Supplement: c5tb00064e1.pdf [file c5tb00064e1.pdf]

## **Poly(phenyleneethylenes) nanoparticles: preparation, living cell imaging and potential application as drug carriers**

Tong Chen, Wanfu Xu, Zehai Huang, Hongmei Peng, Zhiyong Ke, Xinwei Lu, Yichen Yan and  
Ruiyuan Liu

### **Contents**

- Figure S1.**  $^1\text{H}$  NMR spectrum of **1** in DMSO- $d_6$ .
- Figure S2.**  $^{13}\text{C}$  NMR spectrum of **1** in DMSO- $d_6$ .
- Figure S3.** IR spectrum of **1**
- Figure S4.**  $^1\text{H}$ NMR spectrum of poly(**1**) in DMSO- $d_6$ .
- Figure S5.** IR spectrum of poly(**1**).

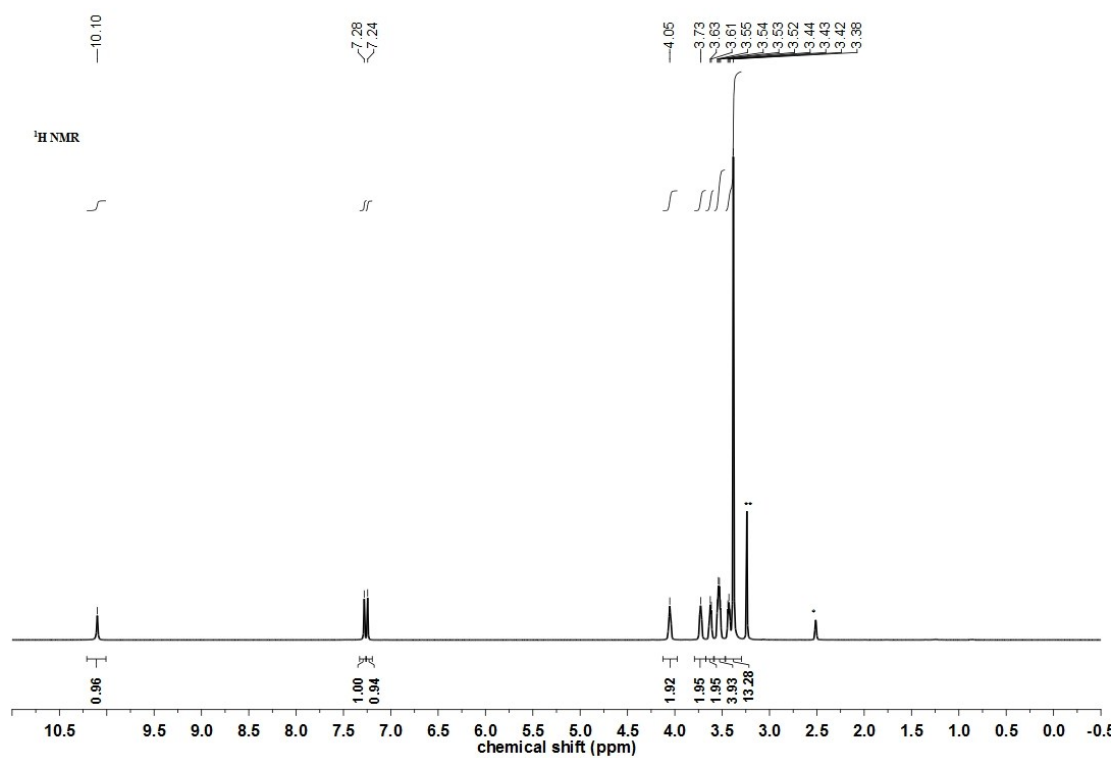

Figure S1. <sup>1</sup>H NMR spectrum of **1** in DMSO-*d*<sub>6</sub>.

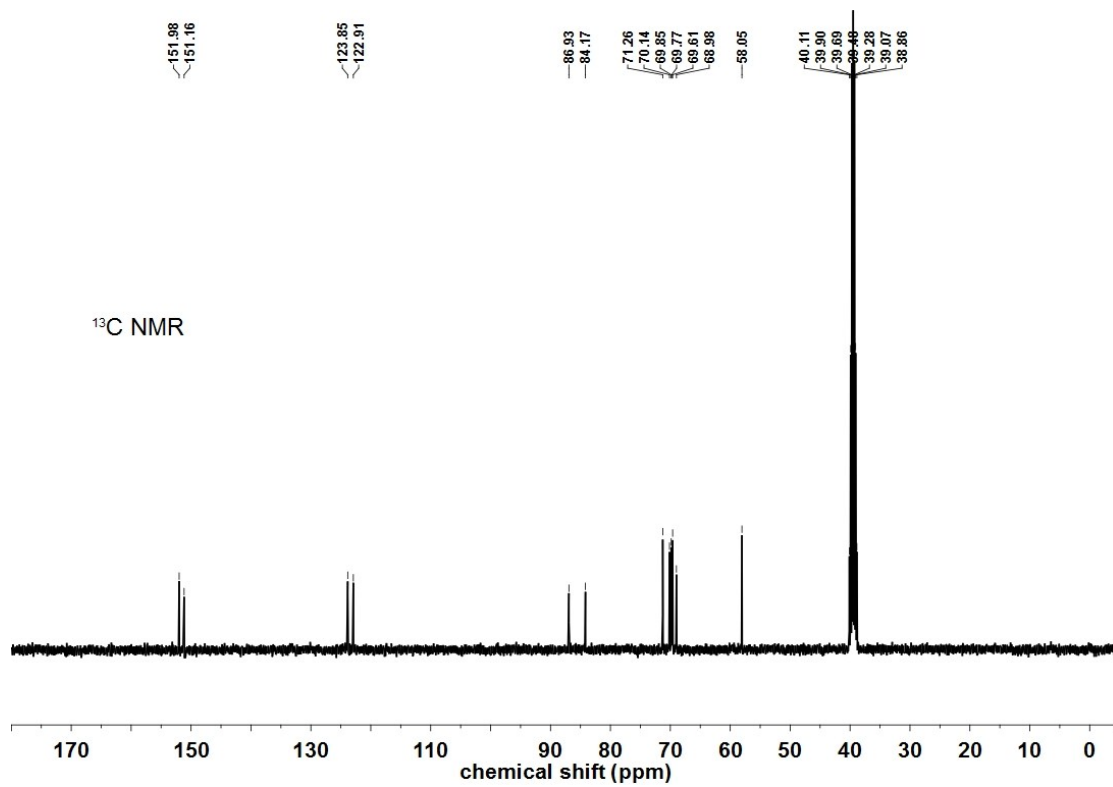

Figure S2. <sup>13</sup>C NMR spectrum of **1** in DMSO-*d*<sub>6</sub>.

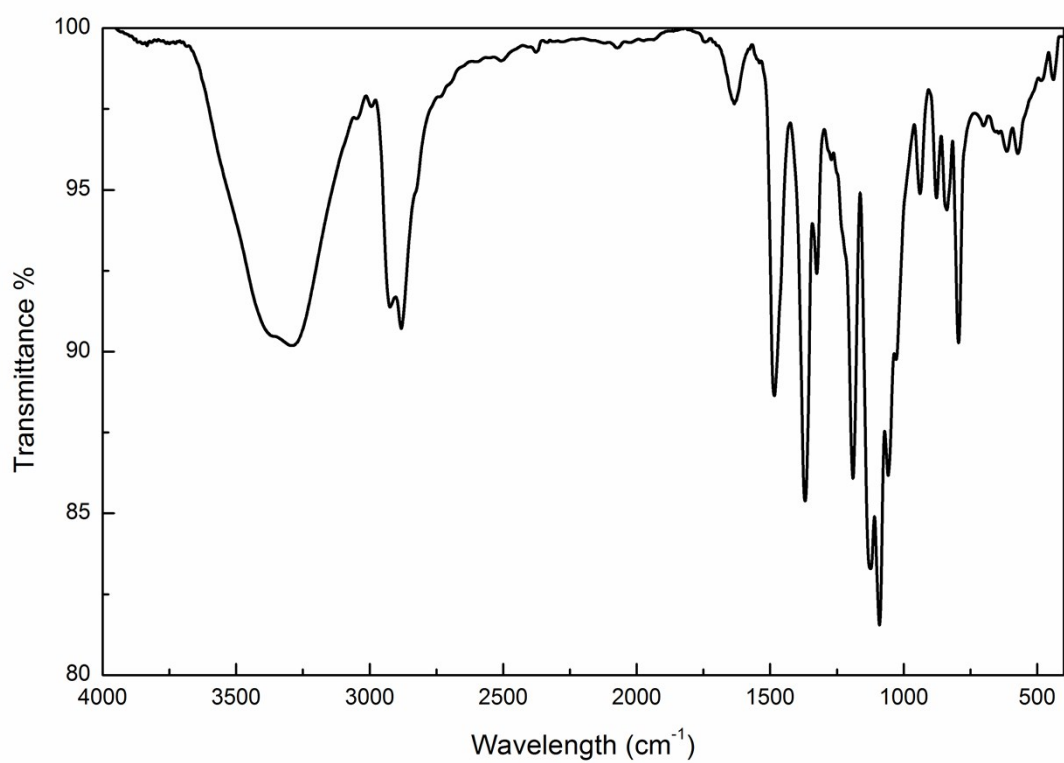

**Figure S3.** IR spectrum of **1**

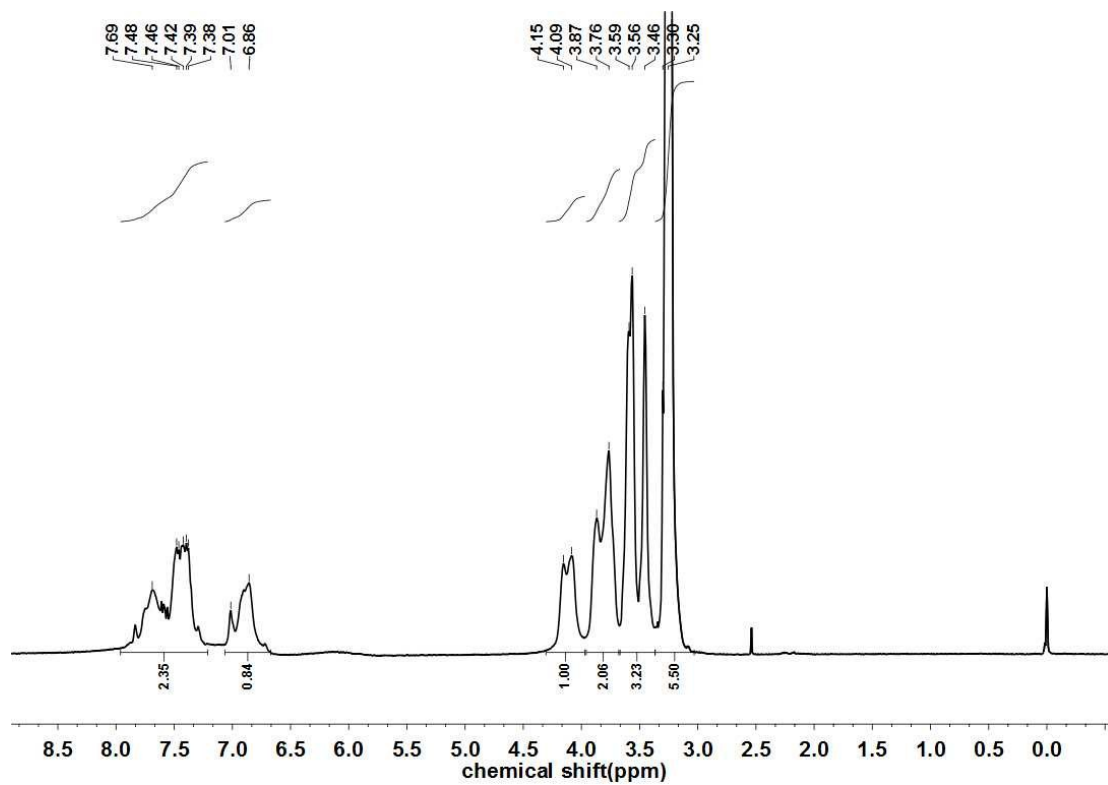

Figure S4. <sup>1</sup>H NMR spectrum of poly(1) in DMSO-d<sub>6</sub>.

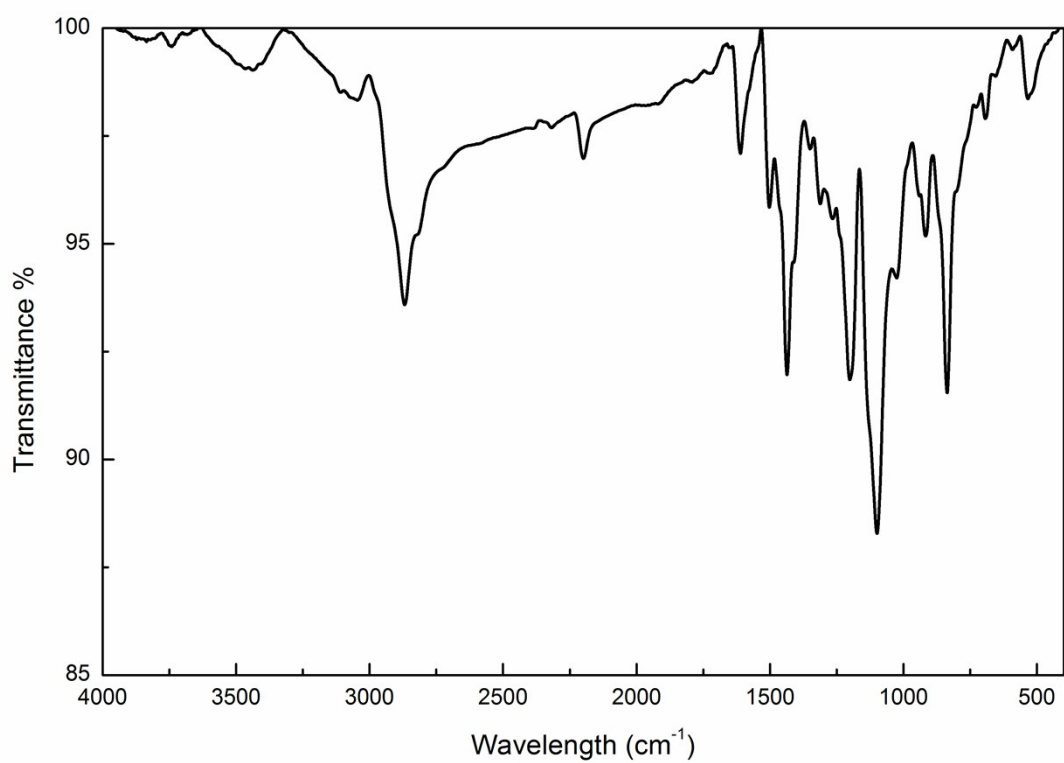

**Figure S5.** IR spectrum of poly(1).
